# Supplementary material for: Mechanochemical Synthesis of Praziquantel Hemihydrate in the Presence of Five Solvents with Different Water Miscibility
Source: MDPI journal article supplement (doi:10.3390/cryst14040374), 2024-04-16
Supplement: s1 [file s1]

## Supporting Information

### Mechanochemical synthesis of PZQ Hemihydrate in the presence of 5 solvents with different water miscibility

Ilenia D'Abbrunzo, Dario Voinovich, Beatrice Perissutti\*

Department of Chemical and Pharmaceutical Sciences, University of Trieste, P.le Europa 1, 34127 Trieste, Italy; [ilenia.d'abbrunzo@phd.units.it](mailto:ilenia.d'abbrunzo@phd.units.it) (I.D.)

#### Contents

| Description                                                                                                                                                                                                | Page N° |
|------------------------------------------------------------------------------------------------------------------------------------------------------------------------------------------------------------|---------|
| <b>Figure S1.</b> PXRD results of the tests in the presence of H <sub>2</sub> O-AA, Di-LAG. Green and grey dotted lines highlight PZQ-AA and PZQ reflections, respectively.                                | 2       |
| <b>Figure S2.</b> DSC results of the tests in the presence of H <sub>2</sub> O-AA, Di-LAG.                                                                                                                 | 2       |
| <b>Figure S3.</b> PXRD results of the tests in the presence of H <sub>2</sub> O-2-pyr, Di-LAG. Green and grey dotted lines highlight PZQ-2-pyr and PZQ reflections, respectively.                          | 3       |
| <b>Figure S4.</b> DSC results of the tests in the presence of H <sub>2</sub> O-2-pyr, Di-LAG.                                                                                                              | 3       |
| <b>Figure S5.</b> PXRD results of the tests in the presence of H <sub>2</sub> O-EtOH, Di-LAG.                                                                                                              | 3       |
| <b>Figure S6.</b> DSC results of the tests in the presence of H <sub>2</sub> O-EtOH, Di-LAG.                                                                                                               | 4       |
| <b>Figure S7.</b> PXRD results of the tests in the presence of H <sub>2</sub> O-EA, Di-LAG.                                                                                                                | 4       |
| <b>Figure S8.</b> DSC results of the tests in the presence of H <sub>2</sub> O-EA, Di-LAG.                                                                                                                 | 4       |
| <b>Figure S9.</b> PXRD results of the tests in the presence of H <sub>2</sub> O-HXN, Di-LAG.                                                                                                               | 5       |
| <b>Figure S10.</b> DSC results of the tests in the presence of H <sub>2</sub> O-HXN, Di-LAG.                                                                                                               | 5       |
| <b>Figure S11.</b> PXRD results of the tests in the presence of H <sub>2</sub> O-2-pyr, NG+LAG procedure. Green, blue and grey dotted lines highlight PZQ-2-pyr, PZQ-HH and PZQ reflections, respectively. | 5       |
| <b>Figure S12.</b> DSC results of the tests in the presence of H <sub>2</sub> O-2-pyr, NG+LAG procedure.                                                                                                   | 6       |
| <b>Figure S13.</b> PXRD results of the tests in the presence of H <sub>2</sub> O-EtOH, NG+LAG procedure. Blue and grey dotted lines highlight PZQ-HH and PZQ reflections, respectively.                    | 6       |
| <b>Figure S14.</b> DSC results of the tests in the presence of H <sub>2</sub> O-EtOH, NG+LAG procedure.                                                                                                    | 6       |

|                                                                                                                                                                                        |   |
|----------------------------------------------------------------------------------------------------------------------------------------------------------------------------------------|---|
| <b>Figure S15.</b> PXRD results of the tests in the presence of H <sub>2</sub> O-EA, NG+LAG procedure. Blue and grey dotted lines highlight PZQ-HH and PZQ reflections, respectively.  | 7 |
| <b>Figure S16.</b> DSC results of the tests in the presence of H <sub>2</sub> O-EA, NG+LAG procedure.                                                                                  | 7 |
| <b>Figure S17.</b> PXRD results of the tests in the presence of H <sub>2</sub> O-HXN, NG+LAG procedure. Blue and grey dotted lines highlight PZQ-HH and PZQ reflections, respectively. | 7 |
| <b>Figure S18.</b> DSC results of the tests in the presence of H <sub>2</sub> O-HXN, NG+LAG procedure.                                                                                 | 8 |
| <b>Figure S19.</b> PXRD results of the five interconversion experiments starting from preformed PZQ-HH.                                                                                | 8 |
| <b>Figure S20.</b> DSC results of the five interconversion experiments starting from preformed PZQ-HH.                                                                                 | 8 |

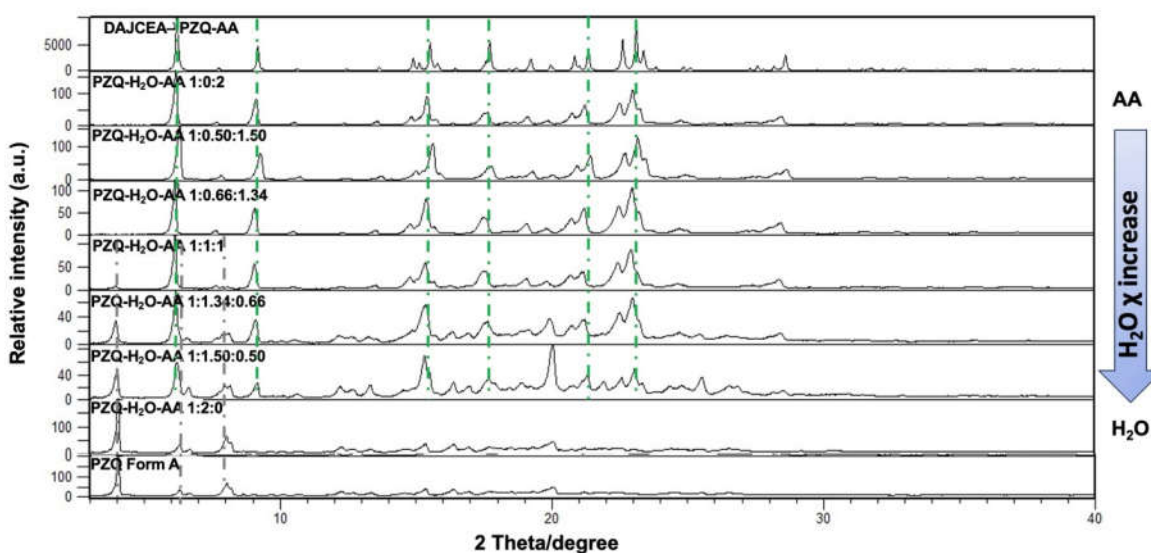

**Figure S1.** PXRD results of the tests in the presence of H<sub>2</sub>O-AA, Di-LAG. Green and grey dotted lines highlight PZQ-AA and PZQ reflections, respectively.

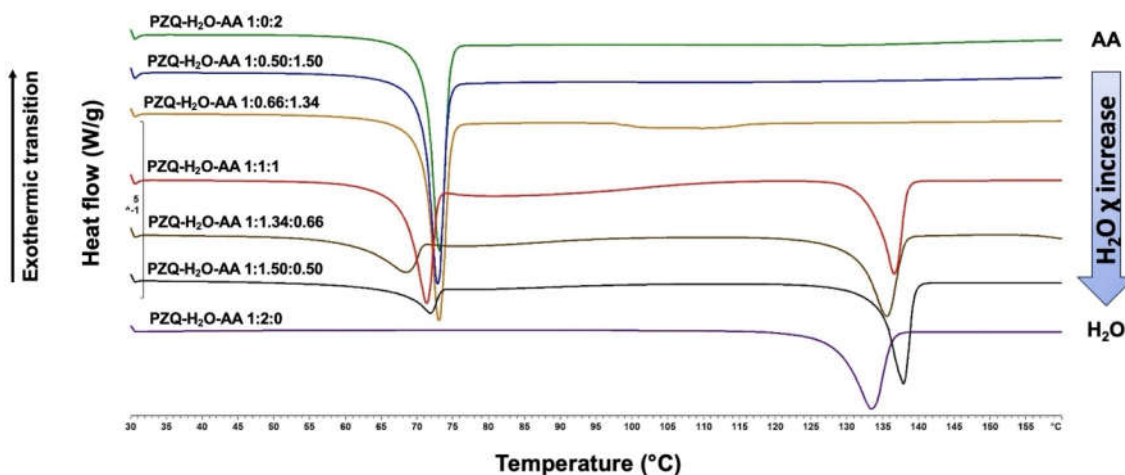

**Figure S2.** DSC results of the tests in the presence of H<sub>2</sub>O-AA, Di-LAG.

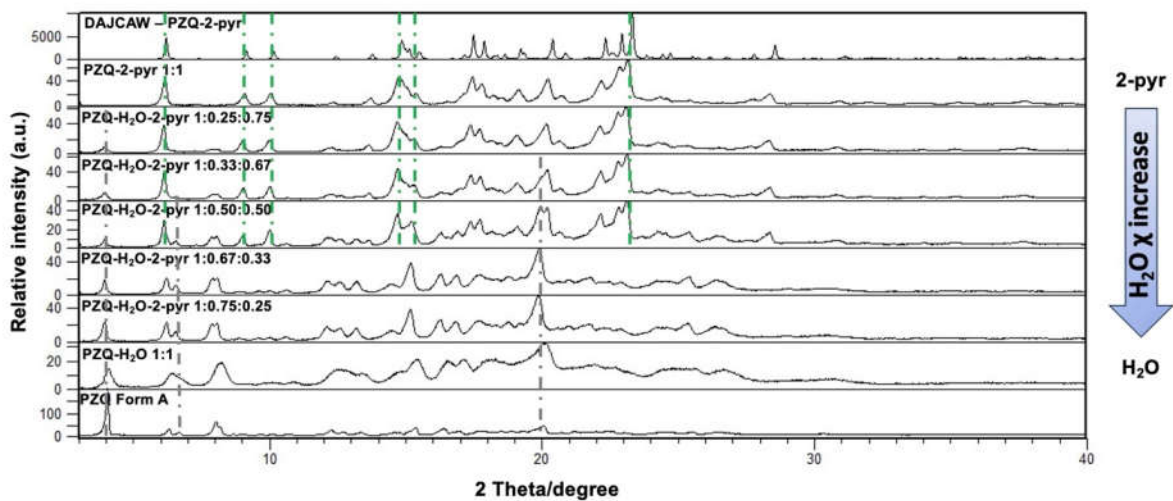

**Figure S3.** PXRD results of the tests in the presence of H<sub>2</sub>O-2-pyr, Di-LAG. Green and grey dotted lines highlight PZQ-2-pyr and PZQ reflections, respectively.

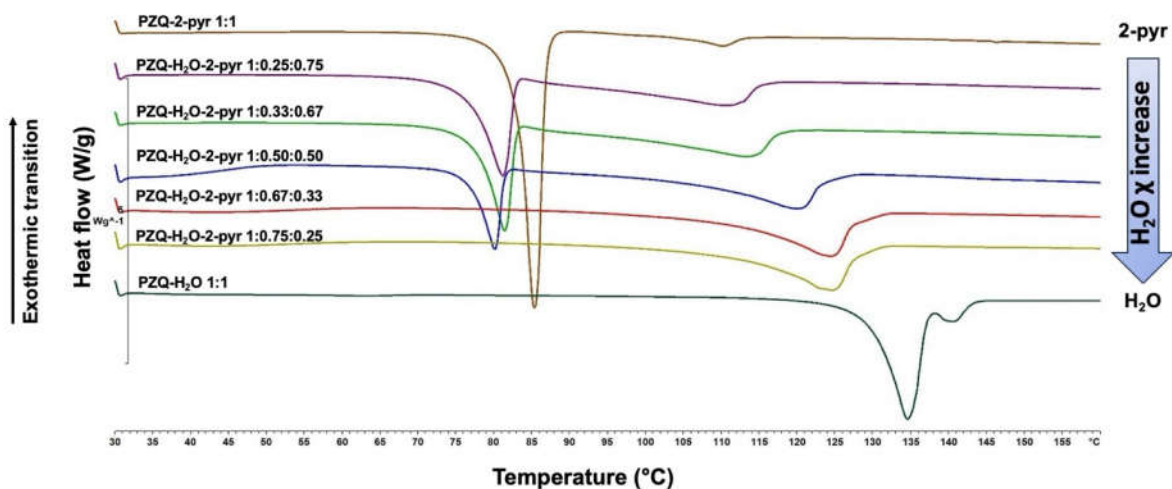

**Figure S4.** DSC results of the tests in the presence of H<sub>2</sub>O-2-pyr, Di-LAG.

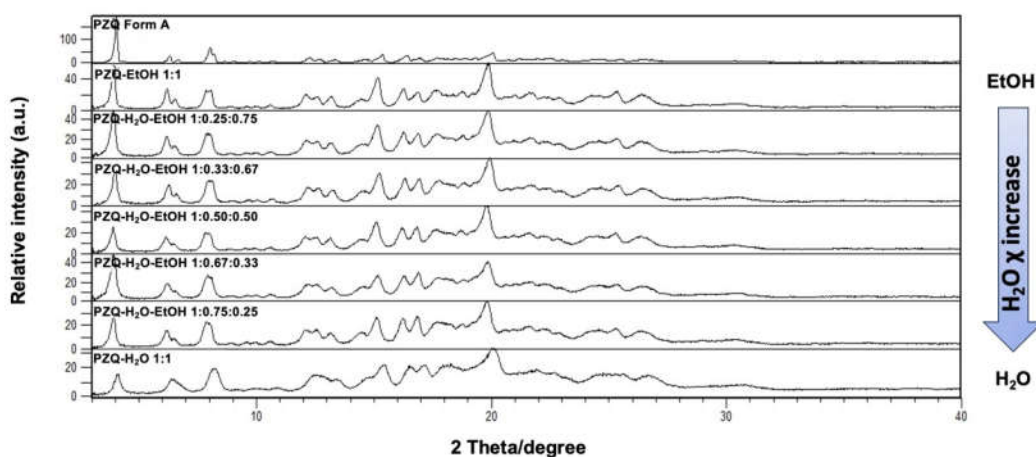

**Figure S5.** PXRD results of the tests in the presence of H<sub>2</sub>O-EtOH, Di-LAG.

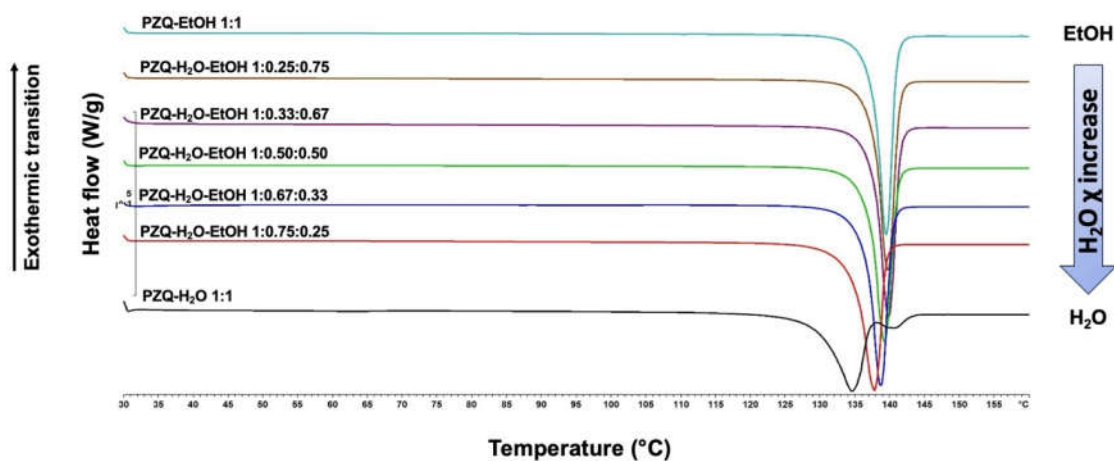

Figure S6. DSC results of the tests in the presence of H<sub>2</sub>O-EtOH, Di-LAG.

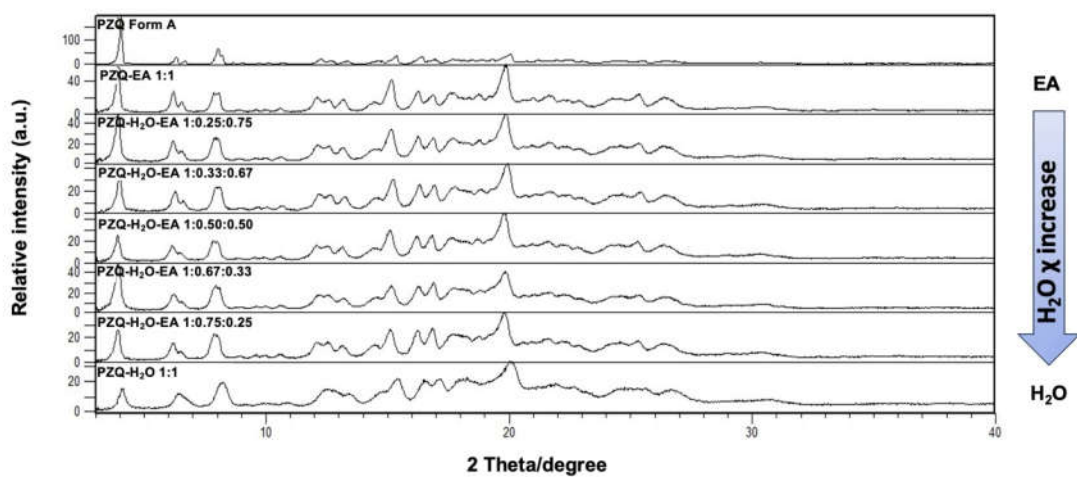

Figure S7. PXRD results of the tests in the presence of H<sub>2</sub>O-EA, Di-LAG.

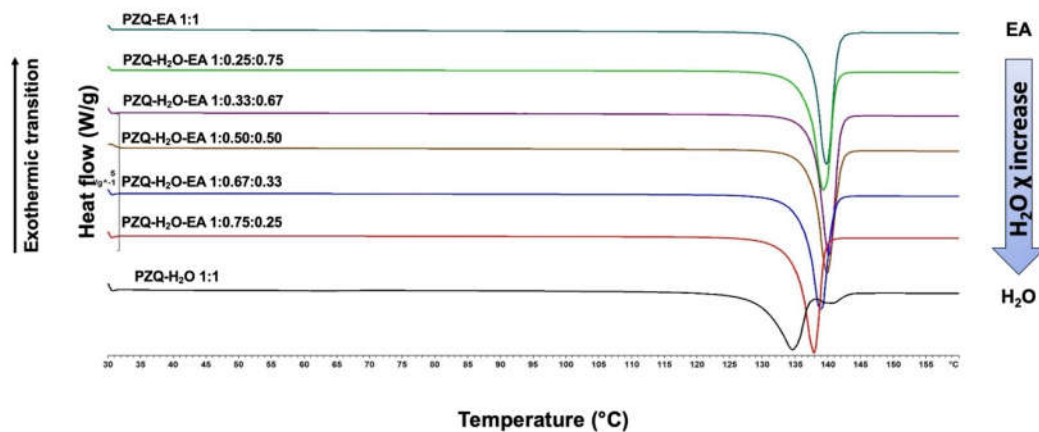

Figure S8. DSC results of the tests in the presence of H<sub>2</sub>O-EA, Di-LAG.

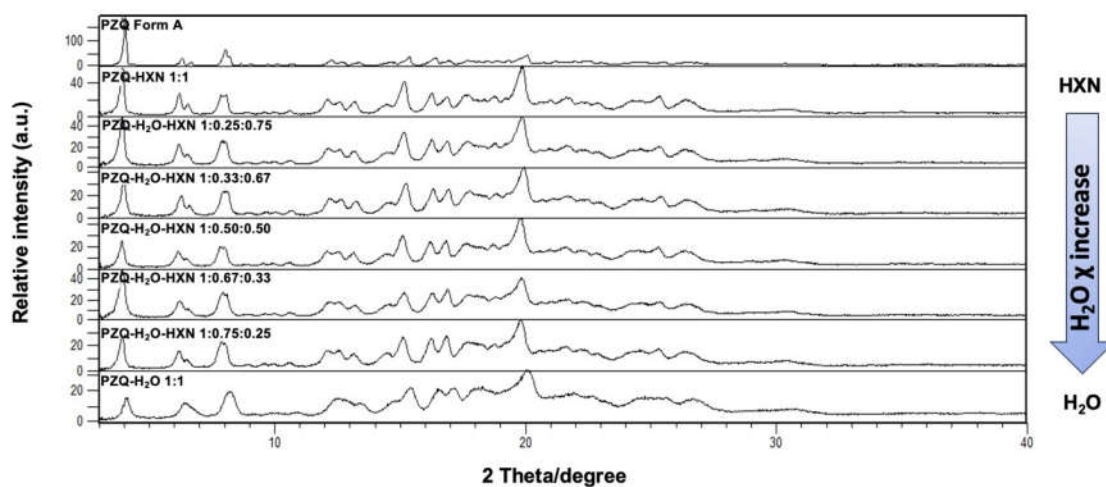

Figure S9. PXRD results of the tests in the presence of H<sub>2</sub>O-HXN, Di-LAG.

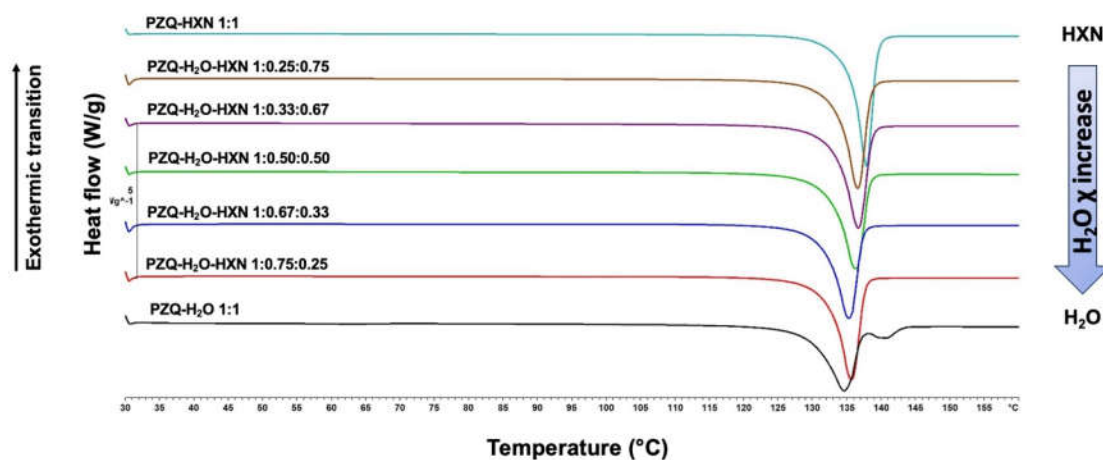

Figure S10. DSC results of the tests in the presence of H<sub>2</sub>O-HXN, Di-LAG.

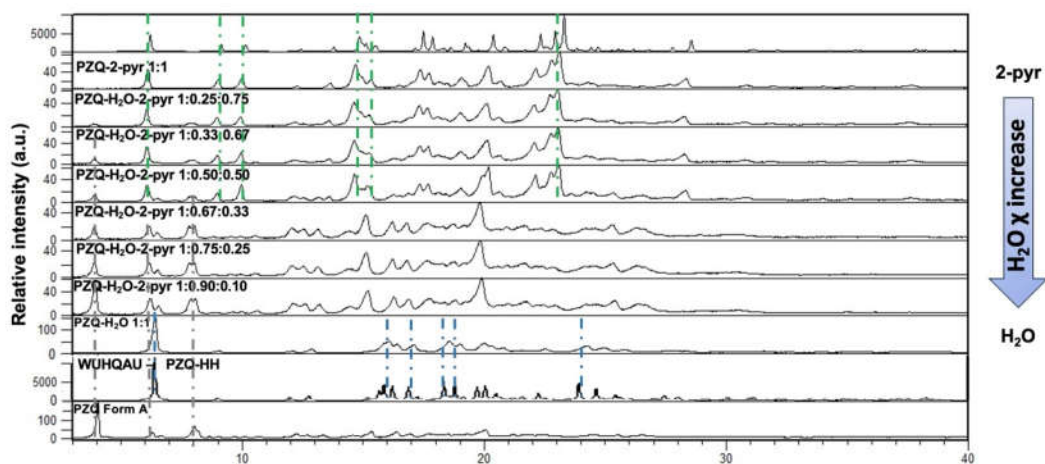

Figure S11. PXRD results of the tests in the presence of H<sub>2</sub>O-2-pyr, NG+LAG procedure. Green, blue and grey dotted lines highlight PZQ-2-pyr, PZQ-HH and PZQ reflections, respectively.

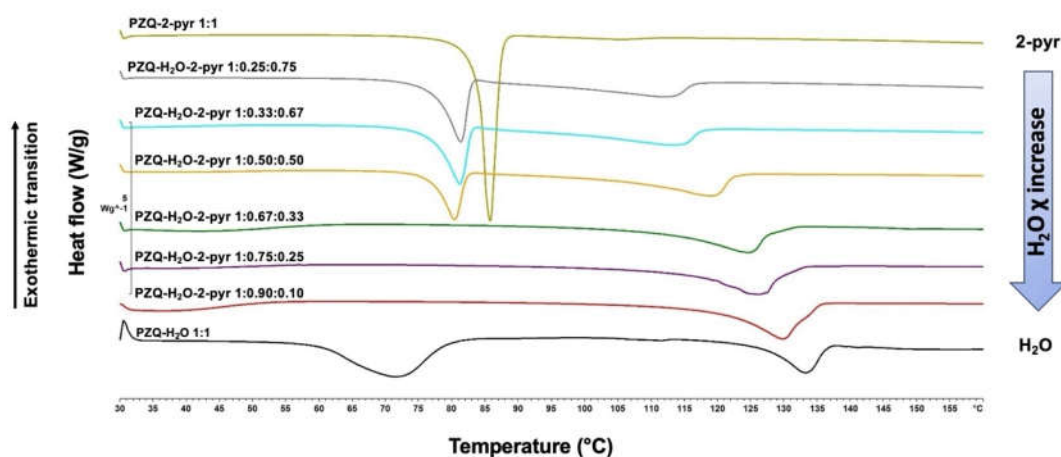

Figure S12. DSC results of the tests in the presence of H<sub>2</sub>O-2-pyr, NG+LAG procedure.

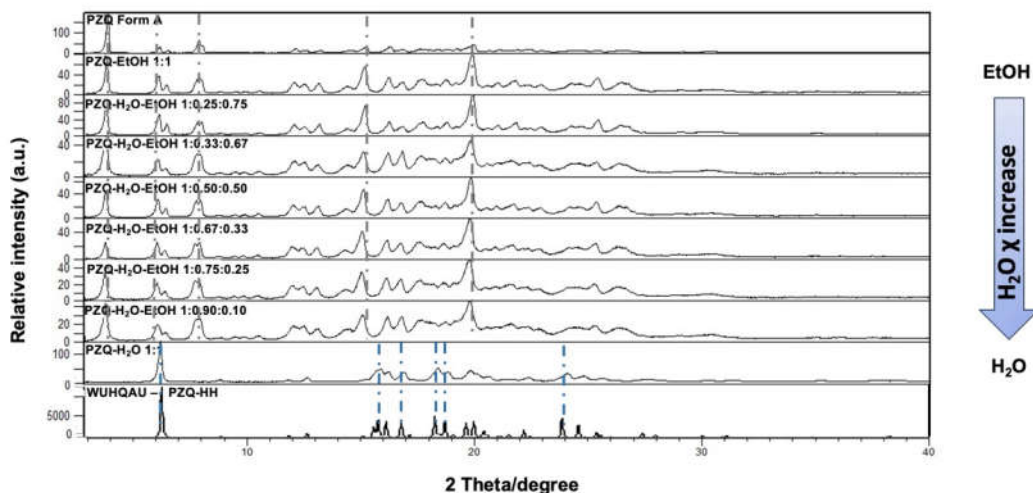

Figure S13. PXRD results of the tests in the presence of H<sub>2</sub>O-EtOH, NG+LAG procedure. Blue and grey dotted lines highlight PZQ-HH and PZQ reflections, respectively.

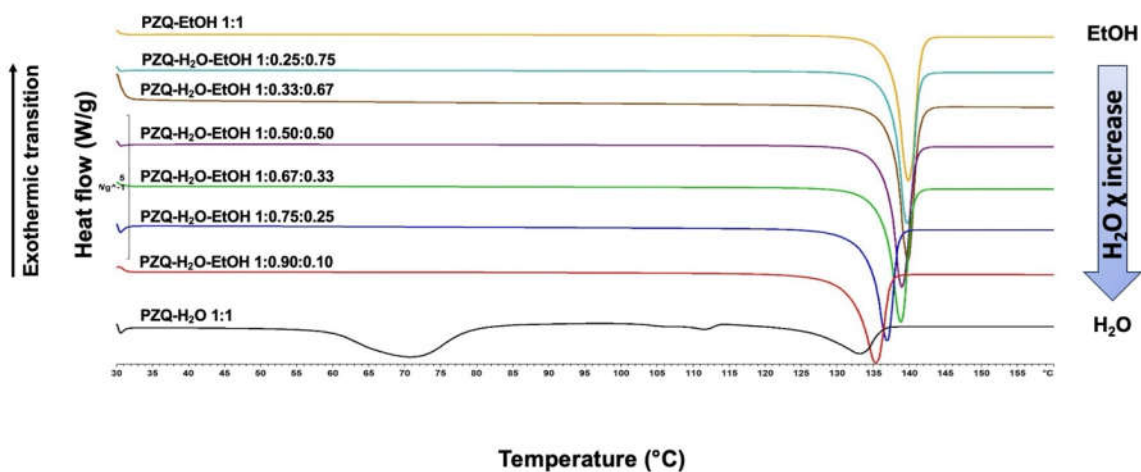

Figure S14. DSC results of the tests in the presence of H<sub>2</sub>O-EtOH, NG+LAG procedure.

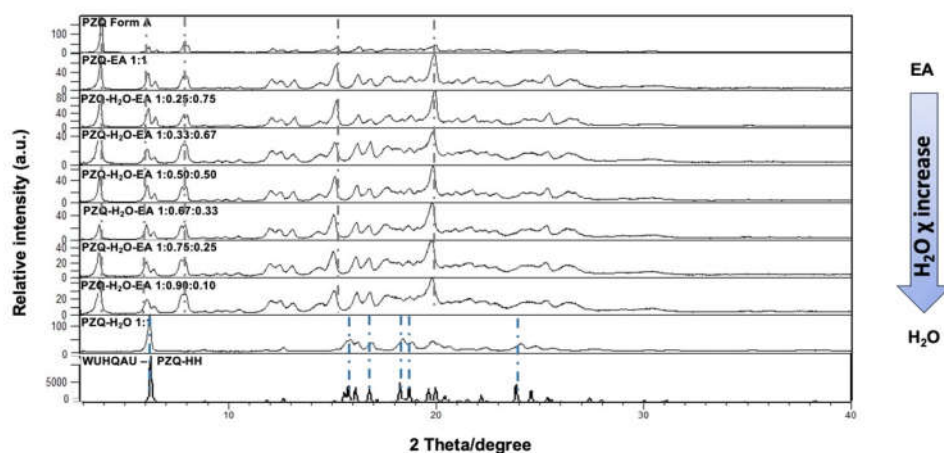

**Figure S15.** PXRD results of the tests in the presence of H<sub>2</sub>O-EA, NG+LAG procedure. Blue and grey dotted lines highlight PZQ-HH and PZQ reflections, respectively.

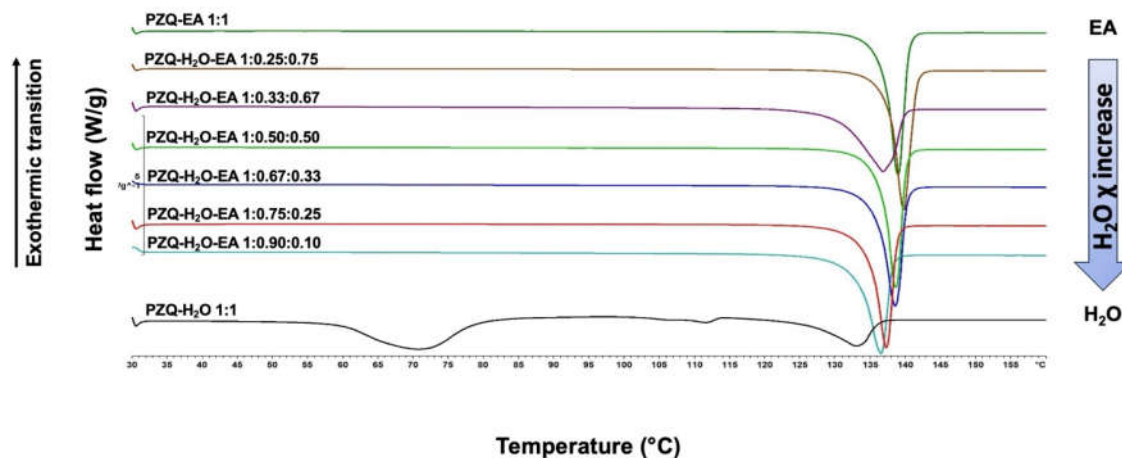

**Figure S16.** DSC results of the tests in the presence of H<sub>2</sub>O-EA, NG+LAG procedure.

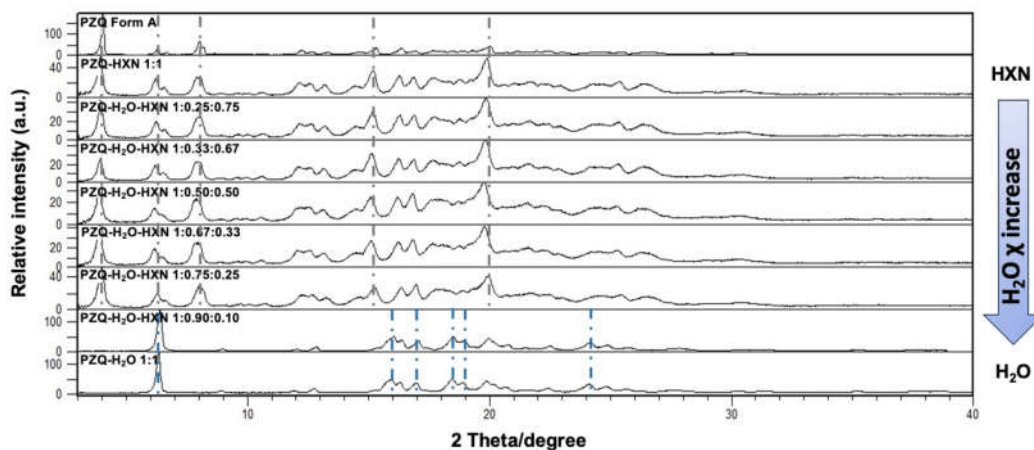

**Figure S17.** PXRD results of the tests in the presence of H<sub>2</sub>O-HXN, NG+LAG procedure. Blue and grey dotted lines highlight PZQ-HH and PZQ reflections, respectively.

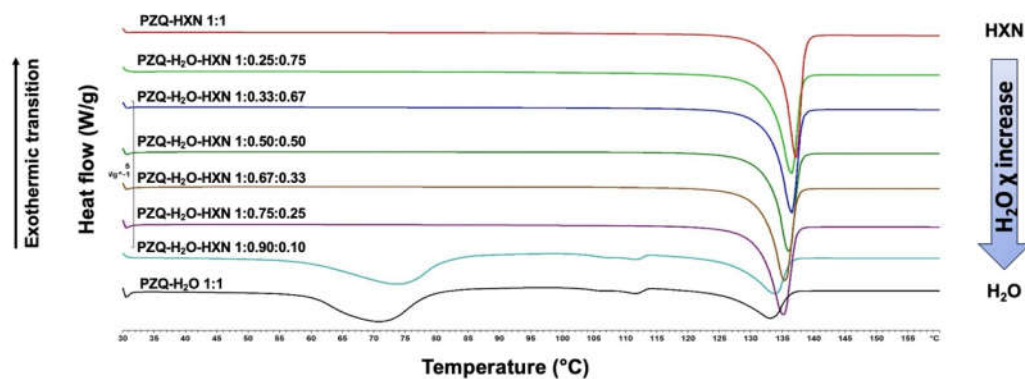

Figure S18. DSC results of the tests in the presence of H<sub>2</sub>O-HXN, NG+LAG procedure.

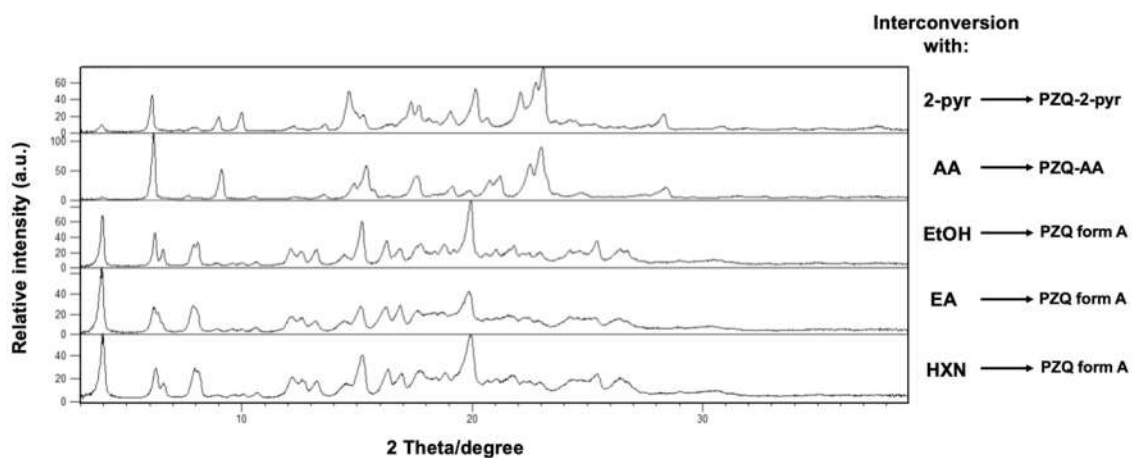

Figure S19. PXRD results of the five interconversion experiments starting from preformed PZQ-HH.

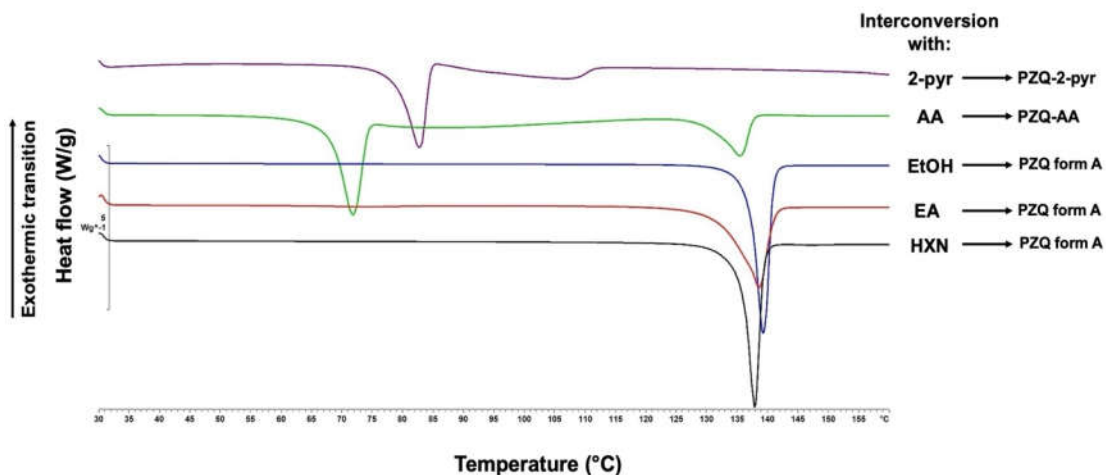

Figure S20. DSC results of the five interconversion experiments starting from preformed PZQ-HH.
